# Supplementary material for: DISC1 Regulates the Proliferation and Migration of Mouse Neural Stem/Progenitor Cells through Pax5, Sox2, Dll1 and Neurog2
Source: PubMed Central journal article supplement (PMC5581844; doi:10.3389/fncel.2017.00261), 2017-08-29
Supplement: Table_1.pdf [file Table_1.pdf]

**Table S1. 84 Neurogenesis related genes covered on the 96-well plate of PCR Array**

| Neurogenesis                            | Genes                                                                                                                                                             |
|-----------------------------------------|-------------------------------------------------------------------------------------------------------------------------------------------------------------------|
| Neuronal Migration                      | Ascl1, Cdk5r1, Dcx, Drd2, Ndn, Neurog2, Nrcam, Ntn1, Pafah1b1, Robo1, Slit2                                                                                       |
| Cell Differentiation                    |                                                                                                                                                                   |
| Neuronal Differentiation                | Ascl1, Bdnf, Bmp2, Bmp4, Cdk5r1, Cdk5rap2, Hes1, Heyl, Mef2c, Neurod1, Neurog1, Neurog2, Nog, Nrcam, Olig2, Pafah1b1, Pax3, Pou4f1, Rtn4, Sox2                    |
| Neuronal Cell Fate                      | Ascl1, Ntf3, Olig2, Sox2                                                                                                                                          |
| Other Regulators                        | Hdac4, Mdk, Nrg1 (Hgl), Odz1, Pax5, Pax6                                                                                                                          |
| Synaptic Functions                      |                                                                                                                                                                   |
| Synaptic Plasticity                     | Adora1, Apoe, Bdnf, Drd2, Grin1, Nf1, S100b                                                                                                                       |
| Synaptic Transmission                   | Apoe, Chrm2, Creb1, Dlg4 (Psd95), Drd2, Fgf2 (Bfgf), Grin1, Pafah1b1, Sod1, Th                                                                                    |
| Synaptogenesis:                         | Ache, Nrcam, Pou4f1                                                                                                                                               |
| Axonogenesis                            | Apbb1, App, Dcx, Drd2, Erbb2 (Her2), Mtap2, Notch1, Nrcam, Pard3, Pou4f1, S100a6, S100b                                                                           |
| Growth Factors<br>& Cytokines           |                                                                                                                                                                   |
| Growth Factors                          | Artn, Bdnf, Egf, Fgf2 (Bfgf), Gdnf, Gpi1, Mdk, Ndp, Nrg1 (Hgl), Ptn, S100a6, Vegfa                                                                                |
| Cytokines                               | Bmp2, Bmp4, Bmp8b, Cxcl1, Gpi1, Il3, Mdk, Ptn, Tgfb1                                                                                                              |
| Apoptosis                               | Adora1, Adora2a, Alk, Apoe, Bcl2, Ep300, Gdnf, Notch2, Ntn1, Pax3, Rtn4, S100b, Vegfa                                                                             |
| Cell Adhesion                           | Dll1, Efnb1, Nrcam, Nrp1, Nrp2, Rac1, Robo1, Slit2, Tnr                                                                                                           |
| Cell Cycle                              | Apbb1, Ep300, Hdac4, Mdk, Mll1, Ndn, Pard3, Ptn                                                                                                                   |
| Signal Transduction                     |                                                                                                                                                                   |
| Notch Signaling                         | App, Ascl1, Dll1, Hes1, Hey1, Hey2, Heyl, Notch1, Notch2, Nrg1 (Hgl)                                                                                              |
| WNT Signaling                           | Dvl3, Ndp, Shh                                                                                                                                                    |
| TGFβ Signaling                          | Bmp2, Bmp4, Bmp8b, Tgfb1                                                                                                                                          |
| G-Protein Coupled<br>Receptor Signaling | Adora1, Adora2a, Chrm2, Cxcl1, Drd2                                                                                                                               |
| Transcription Factors<br>& Cofactors    | Apbb1, Ascl1, Creb1, Ep300, Flna, Hes1, Hey1, Hey2, Heyl, Mef2c, Mll1, Ndn, Neurod1, Neurog1, Neurog2, Nr2e3, Pax3, Pax5, Pax6, Pou3f3, Pou4f1, Sox2, Sox3, Stat3 |
